# Supplementary material for: Independent Clinical Validation of the Automated Ki67 Scoring Guideline from the International Ki67 in Breast Cancer Working Group
Source: MDPI journal article supplement (doi:10.3390/biom11111612), 2021-10-30
Supplement: s1 [file s1]

Supplementary File 1

The list of features used in the random trees-based classification.

|                                 |                                                  |                                                  |
|---------------------------------|--------------------------------------------------|--------------------------------------------------|
|                                 | Smoothed: 25 μm: Nucleus: Area                   | Smoothed: 50 μm: Nucleus: Area                   |
| Nucleus: Area                   | Smoothed: 25 μm: Nucleus: Perimeter              | Smoothed: 50 μm: Nucleus: Perimeter              |
| Nucleus: Perimeter              | Smoothed: 25 μm: Nucleus: Circularity            | Smoothed: 50 μm: Nucleus: Circularity            |
| Nucleus: Circularity            | Smoothed: 25 μm: Nucleus: Max caliper            | Smoothed: 50 μm: Nucleus: Max caliper            |
| Nucleus: Max caliper            | Smoothed: 25 μm: Nucleus: Min caliper            | Smoothed: 50 μm: Nucleus: Min caliper            |
| Nucleus: Min caliper            | Smoothed: 25 μm: Nucleus: Eccentricity           | Smoothed: 50 μm: Nucleus: Eccentricity           |
| Nucleus: Eccentricity           | Smoothed: 25 μm: Nucleus: Hematoxylin OD mean    | Smoothed: 50 μm: Nucleus: Hematoxylin OD mean    |
| Nucleus: Hematoxylin OD mean    | Smoothed: 25 μm: Nucleus: Hematoxylin OD sum     | Smoothed: 50 μm: Nucleus: Hematoxylin OD sum     |
| Nucleus: Hematoxylin OD sum     | Smoothed: 25 μm: Nucleus: Hematoxylin OD std dev | Smoothed: 50 μm: Nucleus: Hematoxylin OD std dev |
| Nucleus: Hematoxylin OD std dev | Smoothed: 25 μm: Nucleus: Hematoxylin OD max     | Smoothed: 50 μm: Nucleus: Hematoxylin OD max     |
| Nucleus: Hematoxylin OD max     | Smoothed: 25 μm: Nucleus: Hematoxylin OD min     | Smoothed: 50 μm: Nucleus: Hematoxylin OD min     |
| Nucleus: Hematoxylin OD min     | Smoothed: 25 μm: Nucleus: Hematoxylin OD range   | Smoothed: 50 μm: Nucleus: Hematoxylin OD range   |
| Nucleus: Hematoxylin OD range   | Smoothed: 25 μm: Nucleus: DAB OD mean            | Smoothed: 50 μm: Nucleus: DAB OD mean            |
| Nucleus: DAB OD mean            | Smoothed: 25 μm: Nucleus: DAB OD sum             | Smoothed: 50 μm: Nucleus: DAB OD sum             |
| Nucleus: DAB OD sum             | Smoothed: 25 μm: Nucleus: DAB OD std dev         | Smoothed: 50 μm: Nucleus: DAB OD std dev         |
| Nucleus: DAB OD std dev         | Smoothed: 25 μm: Nucleus: DAB OD max             | Smoothed: 50 μm: Nucleus: DAB OD max             |
| Nucleus: DAB OD max             | Smoothed: 25 μm: Nucleus: DAB OD min             | Smoothed: 50 μm: Nucleus: DAB OD min             |
| Nucleus: DAB OD min             | Smoothed: 25 μm: Nucleus: DAB OD range           | Smoothed: 50 μm: Nucleus: DAB OD range           |
| Nucleus: DAB OD range           | Smoothed: 25 μm: Cell: Area                      | Smoothed: 50 μm: Cell: Area                      |
| Cell: Area                      | Smoothed: 25 μm: Cell: Perimeter                 | Smoothed: 50 μm: Cell: Perimeter                 |
| Cell: Perimeter                 | Smoothed: 25 μm: Cell: Circularity               | Smoothed: 50 μm: Cell: Circularity               |
| Cell: Circularity               | Smoothed: 25 μm: Cell: Max caliper               | Smoothed: 50 μm: Cell: Max caliper               |
| Cell: Max caliper               | Smoothed: 25 μm: Cell: Min caliper               | Smoothed: 50 μm: Cell: Min caliper               |
| Cell: Min caliper               | Smoothed: 25 μm: Cell: Eccentricity              | Smoothed: 50 μm: Cell: Eccentricity              |
| Cell: Eccentricity              | Smoothed: 25 μm: Cell: DAB OD mean               | Smoothed: 50 μm: Cell: DAB OD mean               |
| Cell: DAB OD mean               | Smoothed: 25 μm: Cell: DAB OD std dev            | Smoothed: 50 μm: Cell: DAB OD std dev            |
| Cell: DAB OD std dev            | Smoothed: 25 μm: Cell: DAB OD max                | Smoothed: 50 μm: Cell: DAB OD max                |
| Cell: DAB OD max                | Smoothed: 25 μm: Cell: DAB OD min                | Smoothed: 50 μm: Cell: DAB OD min                |
| Cell: DAB OD min                | Smoothed: 25 μm: Cytoplasm: DAB OD mean          | Smoothed: 50 μm: Cytoplasm: DAB OD mean          |
| Cytoplasm: DAB OD mean          | Smoothed: 25 μm: Cytoplasm: DAB OD std dev       | Smoothed: 50 μm: Cytoplasm: DAB OD std dev       |
| Cytoplasm: DAB OD std dev       | Smoothed: 25 μm: Cytoplasm: DAB OD max           | Smoothed: 50 μm: Cytoplasm: DAB OD max           |
| Cytoplasm: DAB OD max           | Smoothed: 25 μm: Cytoplasm: DAB OD min           | Smoothed: 50 μm: Cytoplasm: DAB OD min           |
| Cytoplasm: DAB OD min           | Smoothed: 25 μm: Nucleus/Cell area ratio         | Smoothed: 50 μm: Nucleus/Cell area ratio         |
| Nucleus/Cell area ratio         | Smoothed: 25 μm: Nearby detection counts         | Smoothed: 50 μm: Nearby detection counts         |
